# Supplementary material for: Epidemiology and Treatment Patterns of Venous Thromboembolism: an Observational Study of Nationwide Time-Series Trends in Japan
Source: Springer Nature journal article supplement (doi:10.1007/s40119-022-00284-4), 2022-11-01
Supplement: MOESM1 [file 23663460]

**Supplementary Material**

**Epidemiology and Treatment Patterns of Venous Thromboembolism: An Observational  
Study of Nationwide TimeSeries Trends in Japan**

Shoko Takahashi, Miki Imura, Jun Katada

Cardiovascular/Metabolism Medical Affairs, Pfizer Biopharmaceuticals Group, Pfizer Japan Inc.

Corresponding author: Shoko Takahashi

Email: [shoko.takahashi@pfizer.com](mailto:shoko.takahashi@pfizer.com)

## Supplementary Tables

**Table S1** ICD10 codes used to define venous thromboembolism and cancer

| Disease                                                    | ICD10 code (Japanese version)  |
|------------------------------------------------------------|--------------------------------|
| <b>VTE</b>                                                 |                                |
| DVT                                                        | I80.x, I81.x, I82.x            |
| PE                                                         | I26.0, I26.9                   |
| <b>Malignant neoplasms</b>                                 |                                |
| Lip, oral cavity, and pharynx                              | C00-C14, D00.0, D02.0, D02.3   |
| Digestive organs                                           | C15-C26, D00.1x, D01.x         |
| Respiratory and intrathoracic organs                       | C30-C39, D02.1, D02.2          |
| Bone and articular cartilage                               | C40-41                         |
| Skin and melanoma                                          | C43-C44, D03.x                 |
| Mesothelial and soft tissue                                | C45-C49                        |
| Breast                                                     | C50                            |
| Female genital organs                                      | C51-C58, D05.x, D06.x, D07.0-3 |
| Male genital organs                                        | C60-C63, D07.4-5               |
| Urinary tract                                              | C64-C68, D090                  |
| Eye, brain, and other CNS tissues                          | C69-C72                        |
| Thyroid and other endocrine glands                         | C73-C75                        |
| Ill-defined, secondary (metastatic), and unspecified sites | C76-C80                        |
| Lymphoid, hematopoietic, and related tissue                | C81-C96                        |
| Others                                                     | D04.x, D09.2, D09.9            |

*DVT* deep vein thrombosis, *PE* pulmonary embolism, *VTE* venous thromboembolism

**Table S2** Annual trends in the numbers of patients with deep vein thrombosis or pulmonary embolism

|                                                       | Year       |              |              |              |              |              |              |              |
|-------------------------------------------------------|------------|--------------|--------------|--------------|--------------|--------------|--------------|--------------|
|                                                       | 2011       | 2012         | 2013         | 2014         | 2015         | 2016         | 2017         | 2018         |
| All patients with DVT                                 | 1,304      | 1,915        | 3,745        | 6,168        | 8,777        | 10,982       | 14,295       | 16,629       |
| Outpatients with DVT <sup>a</sup>                     | 425 (32.6) | 630 (32.9)   | 1,194 (31.9) | 1,890 (30.6) | 2,926 (33.3) | 3,908 (35.6) | 5,288 (37.0) | 6,400 (38.5) |
| Inpatients for DVT treatment <sup>a</sup>             | 183 (14.0) | 238 (12.4)   | 402 (10.7)   | 627 (10.2)   | 690 (7.9)    | 713 (6.5)    | 824 (5.8)    | 745 (4.5)    |
| Inpatients for conditions other than DVT <sup>a</sup> | 696 (53.4) | 1,047 (54.7) | 2,149 (57.4) | 3,651 (59.2) | 5,161 (58.8) | 6,361 (57.9) | 8,183 (57.2) | 9,484 (57.0) |
| All patients with PE                                  | 416        | 587          | 1,068        | 1,786        | 2,224        | 2,534        | 3,359        | 3,541        |
| Outpatients with PE <sup>b</sup>                      | 19 (4.6)   | 33 (5.6)     | 57 (5.3)     | 89 (5.0)     | 170 (7.6)    | 237 (9.4)    | 389 (11.6)   | 401 (11.3)   |
| Inpatients for PE treatment <sup>b</sup>              | 210 (50.5) | 285 (48.6)   | 478 (44.8)   | 803 (45.0)   | 970 (43.6)   | 1,035 (40.8) | 1,277 (38.0) | 1,351 (38.2) |
| Inpatients for conditions other than PE <sup>b</sup>  | 187 (45.0) | 269 (45.8)   | 533 (49.9)   | 894 (50.1)   | 1,084 (48.7) | 1,262 (49.8) | 1,693 (50.4) | 1,789 (50.5) |

Data are presented as n (%).

<sup>a</sup>Percentages relative to all patients with DVT.

<sup>b</sup>Percentages relative to all patients with PE.

*DVT* deep vein thrombosis, *PE* pulmonary embolism

**Table S3** Chi-square test for the association between treatment status and cancer status (2017–2018)

| <b>Items</b>                    | <b>Without active cancer</b> | <b>With active cancer</b> | <b>Total</b>   |
|---------------------------------|------------------------------|---------------------------|----------------|
| Outpatient treatment            | 8,889 (31.9)                 | 3,589 (36.2)              | 12,478 (33.0)  |
| Other than outpatient treatment | 19,008 (68.1)                | 6,338 (63.8)              | 25,346 (67.0)  |
| Total                           | 27,897 (100.0)               | 9,927 (100.0)             | 37,824 (100.0) |
| Chi-square test                 | 60.96* (P<.0001)             |                           |                |

\*Chi-square value  
Significant at P<.05

**Table S4** Prescription dose at initiation in patients who used direct oral anticoagulants at any point in their VTE treatment

|                                                                       | All patients with DVT | Outpatients with DVT | DVT inpatients 1 | DVT inpatients 2 | DVT patients with active cancer | DVT patients without active cancer |
|-----------------------------------------------------------------------|-----------------------|----------------------|------------------|------------------|---------------------------------|------------------------------------|
| Number of patients                                                    | 30,924                | 11,688               | 1,569            | 17,667           | 8,147                           | 22,777                             |
| <b>Apixaban</b>                                                       |                       |                      |                  |                  |                                 |                                    |
| Number of patients treated with apixaban (%) <sup>a</sup>             | 3,612 (11.7)          | 1,303 (11.1)         | 364 (23.2)       | 1,945 (11.0)     | 882 (10.8)                      | 2,730 (12.0)                       |
| Median number of days from index date to start of use                 | 1.0                   | 0.0                  | 0.0              | 2.0              | 2.0                             | 0.0                                |
| Number of patients whose starting dose was 20 mg/day (%)              | 1,137 (31.5)          | 461 (35.4)           | 190 (52.2)       | 486 (25.0)       | 268 (30.4)                      | 869 (31.8)                         |
| Number of patients whose starting dose was 10 mg/day (%)              | 1,315 (36.4)          | 481 (36.9)           | 128 (35.2)       | 706 (36.3)       | 360 (40.8)                      | 955 (35.0)                         |
| Number of patients whose starting dose was other (%)                  | 1,160 (32.1)          | 361 (27.7)           | 46 (12.6)        | 753 (38.7)       | 254 (28.8)                      | 906 (33.2)                         |
| <b>Edoxaban</b>                                                       |                       |                      |                  |                  |                                 |                                    |
| Number of patients treated with edoxaban (%) <sup>a</sup>             | 15,274 (49.4)         | 6,266 (53.6)         | 622 (39.6)       | 8,386 (47.5)     | 3,564 (43.7)                    | 11,710 (51.4)                      |
| Median number of days from index date to start of use                 | 3.0                   | 7.0                  | 2.0              | 2.0              | 3.0                             | 3.0                                |
| Number of patients whose starting dose was 60 mg/day (%) <sup>b</sup> | 2,184 (14.3)          | 977 (15.6)           | 177 (28.5)       | 1,030 (12.3)     | 669 (18.8)                      | 1,515 (12.9)                       |
| Number of patients whose starting dose was 30 mg/day (%) <sup>b</sup> | 10,569 (69.2)         | 4,214 (67.3)         | 430 (69.1)       | 5,925 (70.7)     | 2,661 (74.7)                    | 7,908 (67.5)                       |
| Number of patients whose starting dose was other (%) <sup>b</sup>     | 2,521 (16.5)          | 1,075 (17.2)         | 15 (2.4)         | 1,431 (17.1)     | 234 (6.6)                       | 2,287 (19.5)                       |
| <b>Rivaroxaban</b>                                                    |                       |                      |                  |                  |                                 |                                    |
| Number of patients treated with rivaroxaban (%) <sup>a</sup>          | 2,829 (9.1)           | 1,146 (9.8)          | 321 (20.5)       | 1,362 (7.7)      | 680 (8.3)                       | 2,149 (9.4)                        |
| Median number of days from index date to start of use                 | 1.0                   | 0.0                  | 0.0              | 1.0              | 2.0                             | 1.0                                |
| Number of patients whose starting dose was 30 mg/day (%) <sup>b</sup> | 1,088 (38.5)          | 489 (42.7)           | 196 (61.1)       | 403 (29.6)       | 255 (37.5)                      | 833 (38.8)                         |
| Number of patients whose starting dose was 15 mg/day (%) <sup>b</sup> | 1,108 (39.2)          | 443 (38.7)           | 95 (29.6)        | 570 (41.9)       | 306 (45.0)                      | 802 (37.3)                         |
| Number of patients whose starting dose was other (%) <sup>b</sup>     | 633 (22.4)            | 214 (18.7)           | 30 (9.3)         | 389 (28.6)       | 119 (17.5)                      | 514 (23.9)                         |
|                                                                       | All patients with PE  | Outpatients with PE  | PE inpatients 1  | PE inpatients 2  | PE patients with active cancer  | PE patients without active cancer  |
| Number of patients                                                    | 6,900                 | 790                  | 2,628            | 3,482            | 1,780                           | 5,120                              |
| <b>Apixaban</b>                                                       |                       |                      |                  |                  |                                 |                                    |
| Number of patients treated with apixaban (%) <sup>a</sup>             | 1,416 (20.5)          | 170 (21.5)           | 694 (26.4)       | 552 (15.9)       | 382 (21.5)                      | 1,034 (20.2)                       |

|                                                                       |              |            |            |              |            |              |
|-----------------------------------------------------------------------|--------------|------------|------------|--------------|------------|--------------|
| Median number of days from index date to start of use                 | 1.0          | 0.0        | 0.0        | 1.5          | 1.0        | 0.0          |
| Number of patients whose starting dose was 20 mg/day (%) <sup>b</sup> | 704 (49.7)   | 83 (48.8)  | 392 (56.5) | 229 (41.5)   | 178 (46.6) | 526 (50.9)   |
| Number of patients whose starting dose was 10 mg/day (%) <sup>b</sup> | 504 (35.6)   | 61 (35.9)  | 236 (34.0) | 207 (37.5)   | 154 (40.3) | 350 (33.8)   |
| Number of patients whose starting dose was other (%) <sup>b</sup>     | 208 (14.7)   | 26 (15.3)  | 66 (9.5)   | 116 (21.0)   | 50 (13.1)  | 158 (15.3)   |
| <b>Edoxaban</b>                                                       |              |            |            |              |            |              |
| Number of patients treated with edoxaban (%) <sup>a</sup>             | 2,529 (36.7) | 300 (38.0) | 951 (36.2) | 1,278 (36.7) | 724 (40.7) | 1,805 (35.3) |
| Median number of days from index date to start of use                 | 3.0          | 1.0        | 3.0        | 4.0          | 4.0        | 3.0          |
| Number of patients whose starting dose was 60 mg/day (%) <sup>b</sup> | 794 (31.4)   | 106 (35.3) | 373 (39.2) | 315 (24.6)   | 218 (30.1) | 576 (31.9)   |
| Number of patients whose starting dose was 30 mg/day (%) <sup>b</sup> | 1,630 (64.5) | 183 (61.0) | 573 (60.3) | 874 (68.4)   | 492 (68.0) | 1,138 (63.0) |
| Number of patients whose starting dose was other (%) <sup>b</sup>     | 105 (4.2)    | 11 (3.7)   | 5 (0.5)    | 89 (7.0)     | 14 (1.9)   | 91 (5.0)     |
| <b>Rivaroxaban</b>                                                    |              |            |            |              |            |              |
| Number of patients treated with rivaroxaban (%) <sup>a</sup>          | 1,196 (17.3) | 129 (16.3) | 683 (26.0) | 384 (11.0)   | 262 (14.7) | 934 (18.2)   |
| Median number of days from index date to start of use                 | 1.0          | 0.0        | 0.0        | 2.0          | 2.0        | 1.0          |
| Number of patients whose starting dose was 30 mg/day (%) <sup>b</sup> | 706 (59.0)   | 76 (58.9)  | 460 (67.3) | 170 (44.3)   | 150 (57.3) | 556 (59.5)   |
| Number of patients whose starting dose was 15 mg/day (%) <sup>b</sup> | 396 (33.1)   | 46 (35.7)  | 193 (28.3) | 157 (40.9)   | 94 (35.9)  | 302 (32.3)   |
| Number of patients whose starting dose was other (%) <sup>b</sup>     | 94 (7.9)     | 7 (5.4)    | 30 (4.4)   | 57 (14.8)    | 18 (6.9)   | 76 (8.1)     |

<sup>a</sup>Percentages of patients were calculated using the total number in each category as the denominator.

<sup>b</sup>Percentages of patients were calculated using as the denominator the number of patients who were treated with each direct anticoagulant.

*DVT inpatients 1* patients with DVT hospitalized for DVT treatment, *DVT inpatients 2* patients with DVT hospitalized for purposes other than DVT treatment, *PE inpatients 1* patients with PE hospitalized for PE treatment, *PE inpatients 2* patients with PE hospitalized for purposes other than PE treatment.  
*DVT* deep vein thrombosis, *PE* pulmonary embolism

## Supplementary Figures

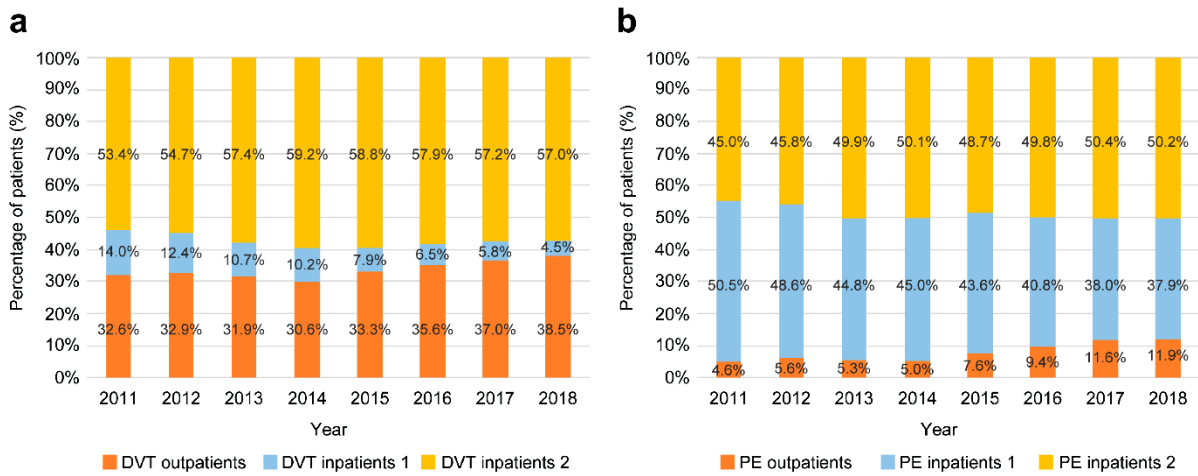

**Fig. S1** Inpatient and outpatient proportions by DVT and PE (2011–2018). The percentages of inpatients and outpatients in the DVT (**a**) and PE (**b**) groups in each year (2011–2018). *Outpatients* These patients were outpatients at the time of diagnosis of DVT or PE and were subsequently treated for DVT/PE on an outpatient basis. *DVT/PE inpatients 1* These patients were outpatients at the time of VTE diagnosis and were subsequently hospitalized for VTE treatment. *DVT/PE inpatients 2* These patients were already hospitalized for other reasons at the time of VTE diagnosis (the principal diagnosis of hospitalization was not DVT or PE). *DVT* deep vein thrombosis, *PE* pulmonary embolism, *VTE* venous thromboembolism

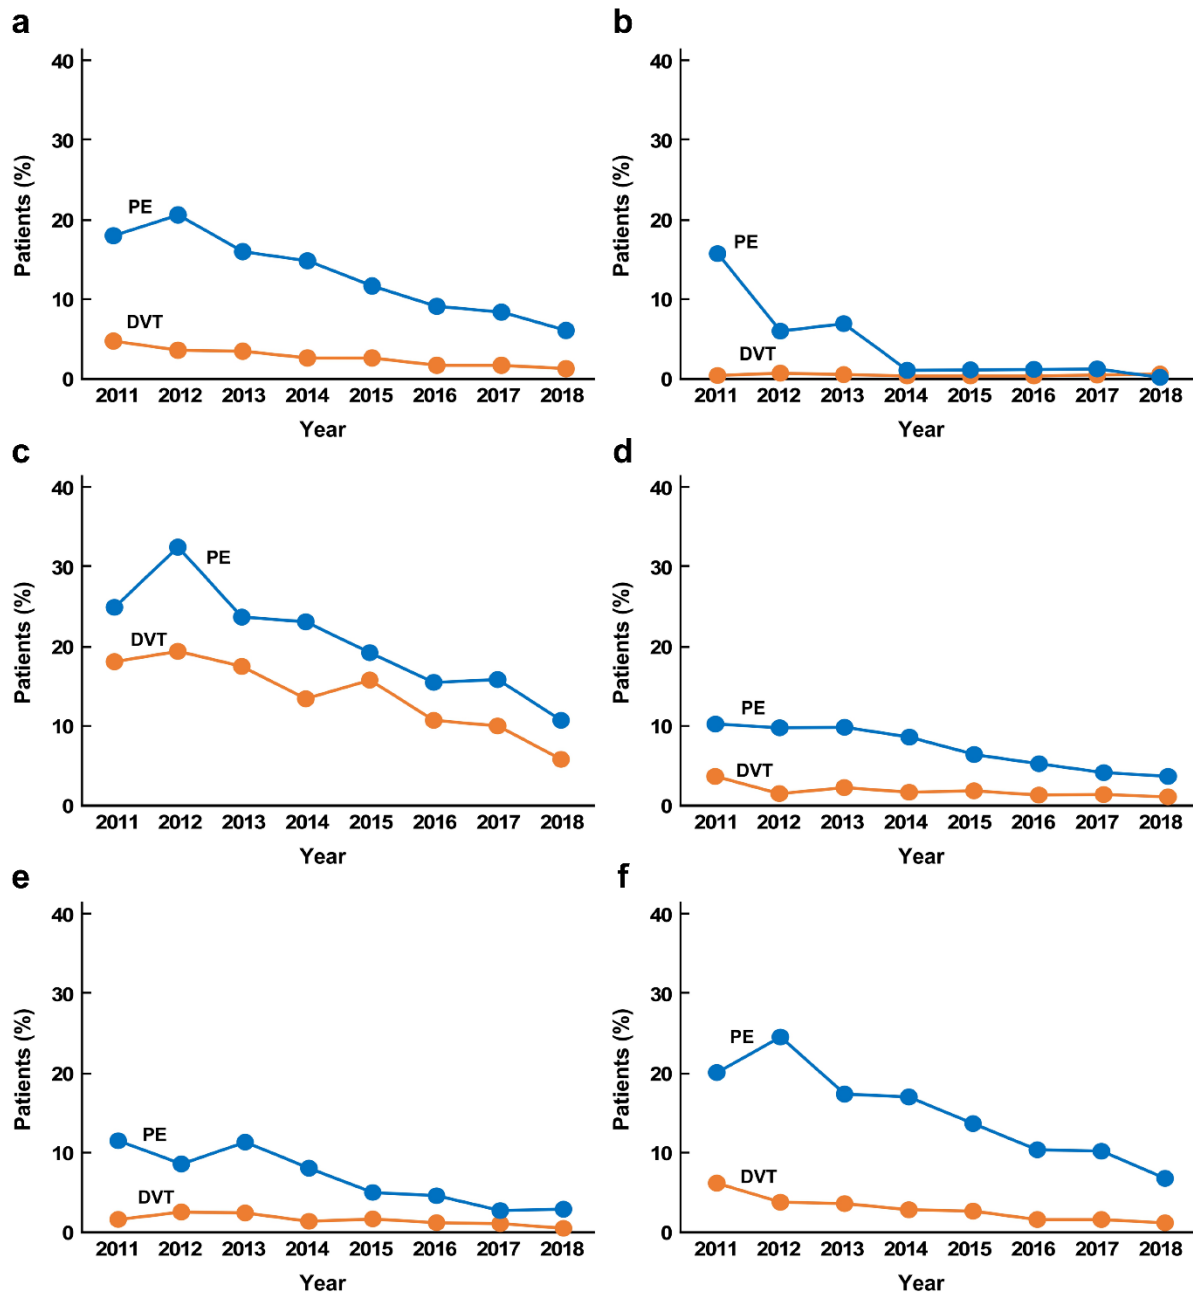

**Fig. S2** Proportions of urokinase or tPA use in the treatment of venous thromboembolism in realworld settings. The percentages of patients treated with urokinase or tPA in each year (2011–2018) are shown for the DVT and PE groups. **(a)** All patients, **(b)** outpatients, **(c)** patients hospitalized for the treatment of DVT or PE, **(d)** patients hospitalized for purposes other than DVT or PE treatment, **(e)** patients with active cancer, and **(f)** patients without active cancer. *DVT* deep vein thrombosis, *PE* pulmonary embolism, *tPA* tissue plasminogen activator



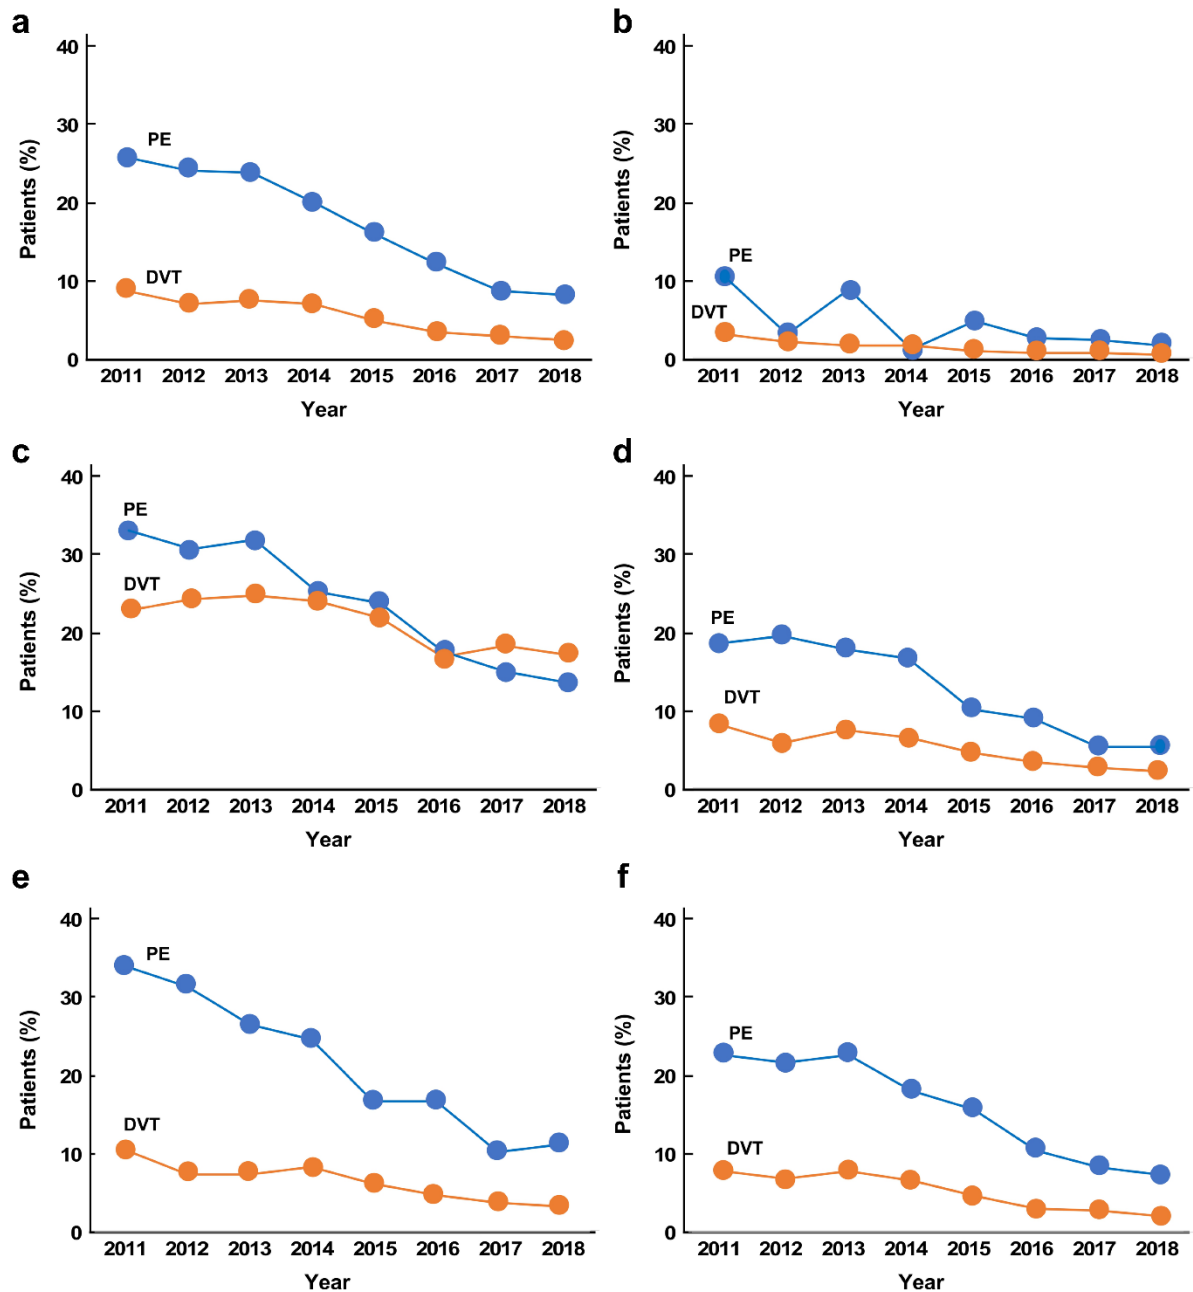

**Fig. S3** Proportion of IVC filter use in the treatment of venous thromboembolism in realworld settings. The percentages of patients undergoing IVC filter placement in each year (2011–2018) are shown for the DVT and PE groups. **(a)** All patients, **(b)** outpatients, **(c)** patients hospitalized for the treatment of DVT or PE, **(d)** patients hospitalized for purposes other than DVT or PE treatment, **(e)** patients with active cancer, and **(f)** patients without active cancer. *DVT* deep vein thrombosis, *IVC* inferior vena cava, *PE* pulmonary embolism
